# Supplementary material for: Mms19 promotes spindle microtubule assembly in Drosophila neural stem cells
Source: PubMed Central journal article supplement (PMC7714366; doi:10.1371/journal.pgen.1008913), 2020-11-19

# S1 Fig: *Mms19<sup>P</sup>* NBs do not display elevated levels of aneuploidy

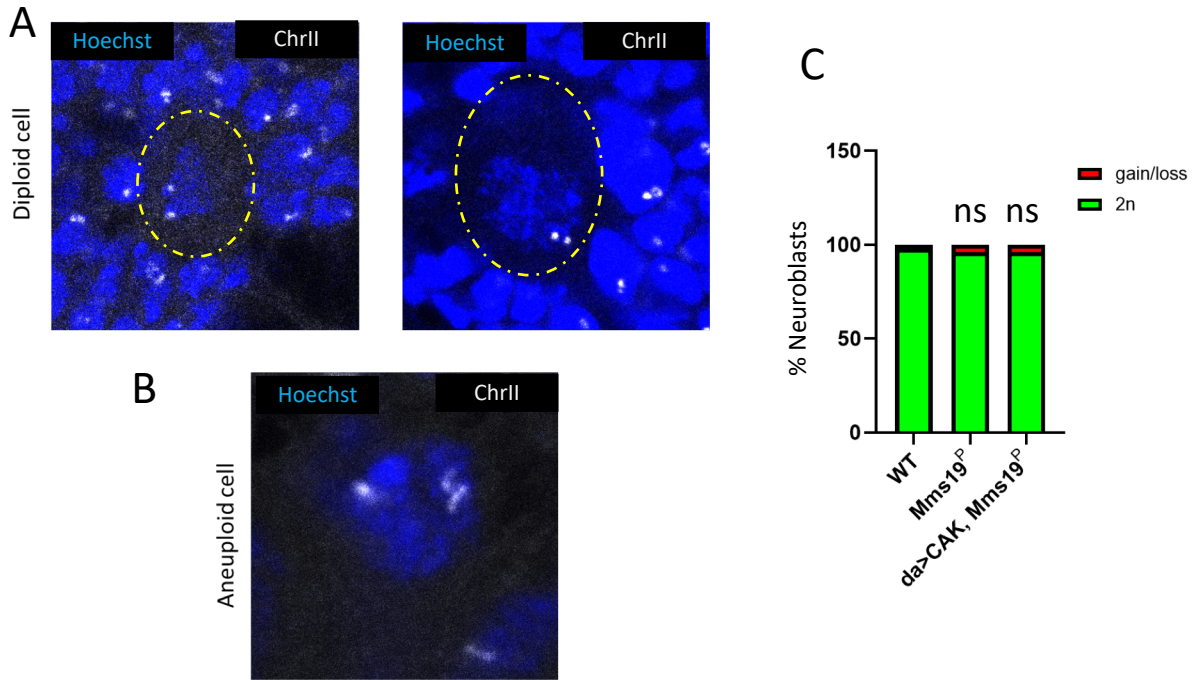

Supplement: pgen.1008913.s001.pdf [file pgen.1008913.s001.pdf]
