# Supplementary material for: Mms19 promotes spindle microtubule assembly in Drosophila neural stem cells
Source: PubMed Central journal article supplement (PMC7714366; doi:10.1371/journal.pgen.1008913), 2020-11-19

# S2 Fig: Phospho-Histone H3 (pH3) staining reveals a higher proportion of *Mms19<sup>P</sup>* NBs undergoing mitosis

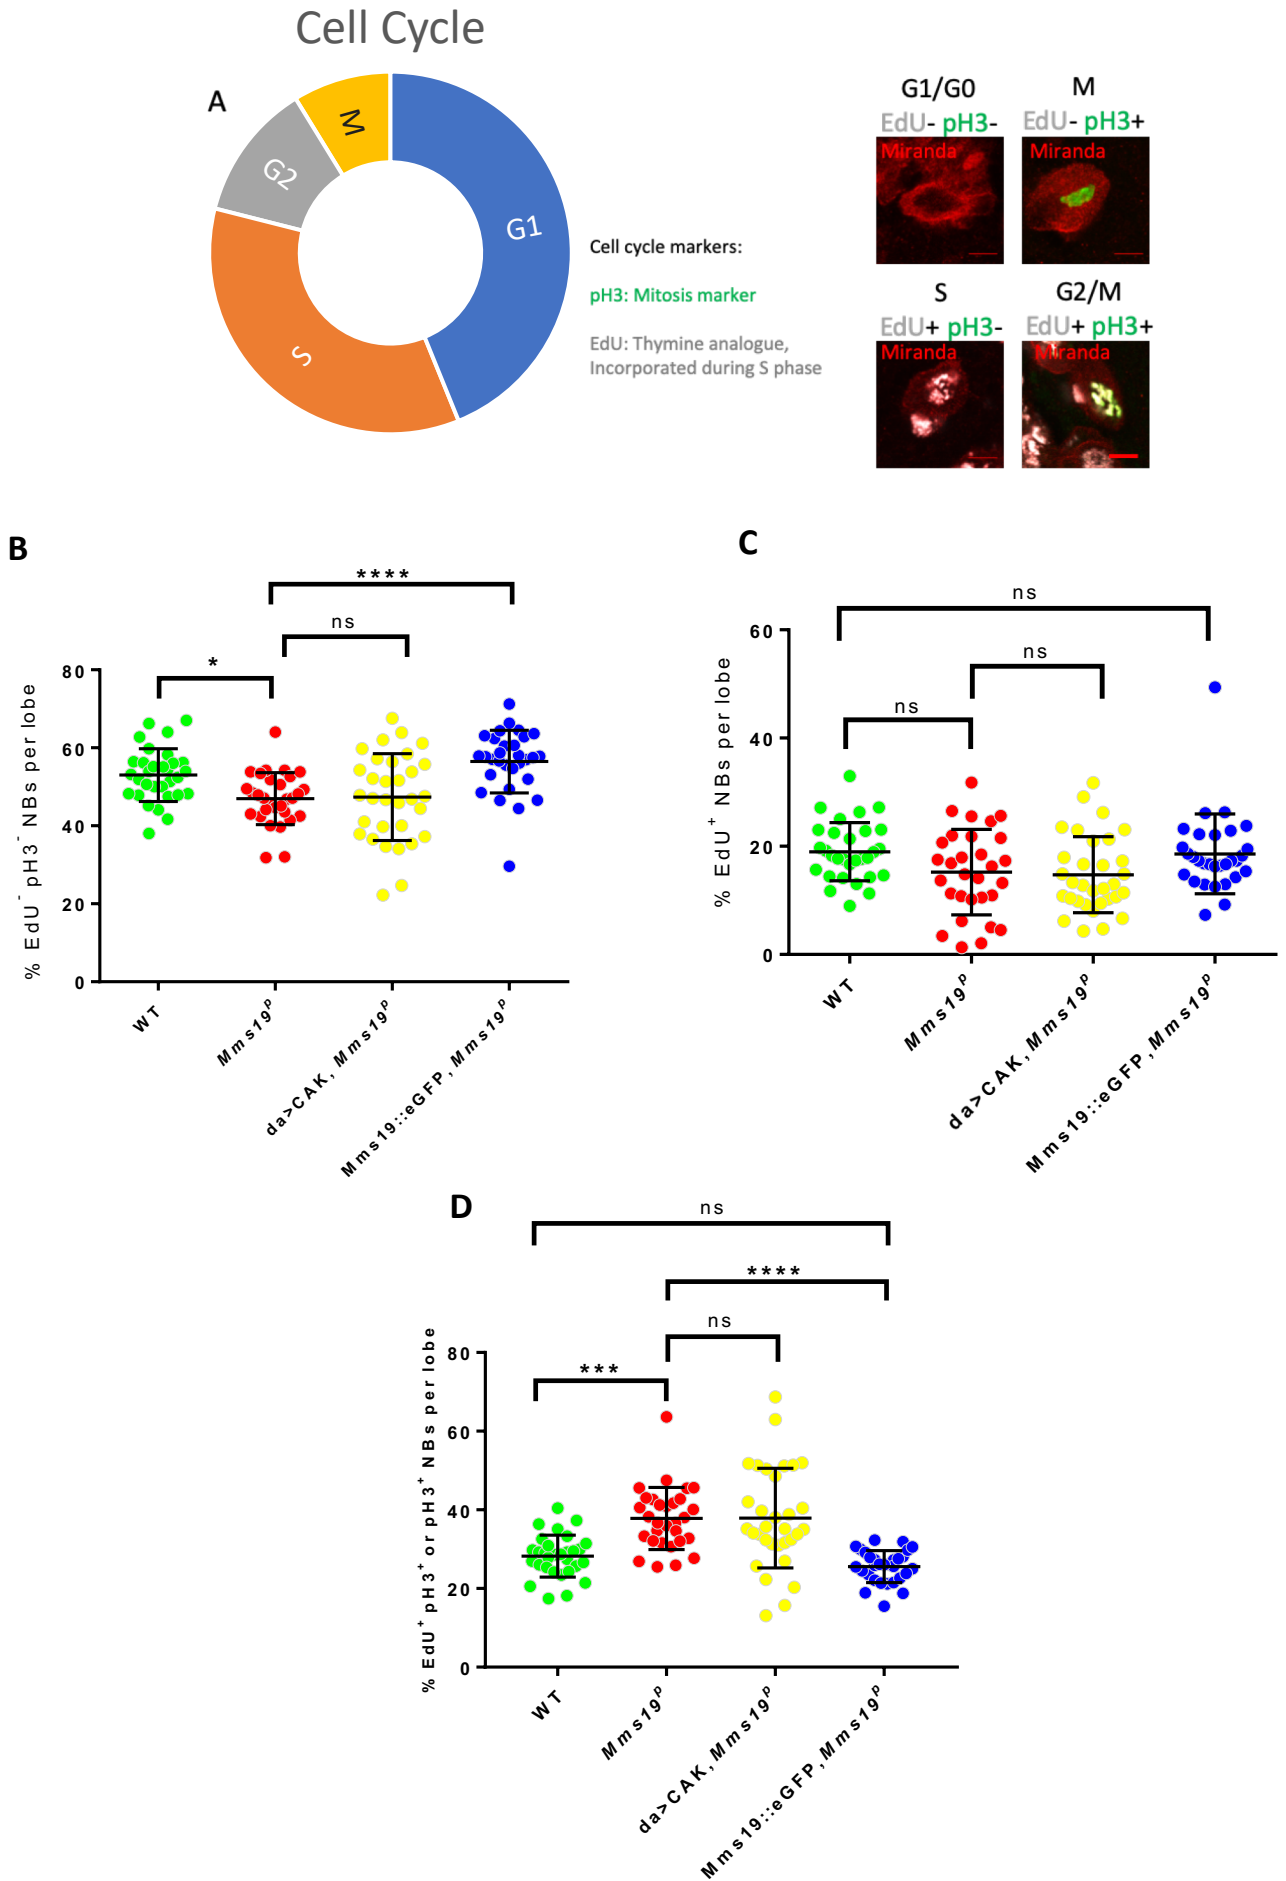

Supplement: pgen.1008913.s002.pdf [file pgen.1008913.s002.pdf]
