# Supplementary material for: Mms19 promotes spindle microtubule assembly in Drosophila neural stem cells
Source: PubMed Central journal article supplement (PMC7714366; doi:10.1371/journal.pgen.1008913), 2020-11-19

### S3 Fig: *Mms19* is cell autonomously required to maintain normal cell numbers in MARCM clones

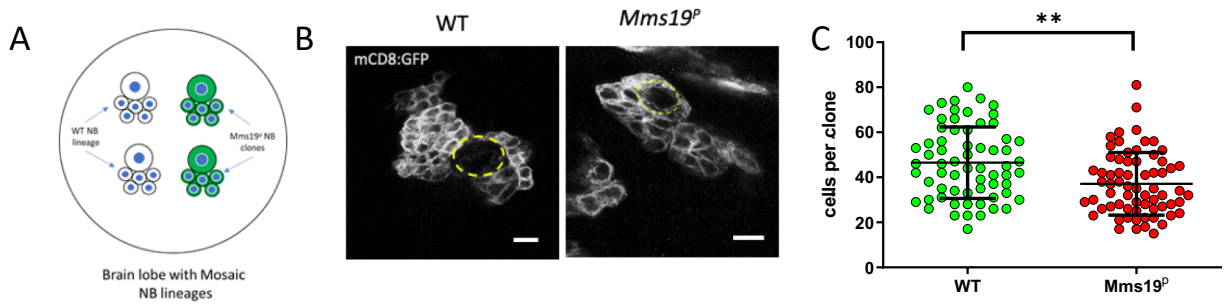

Supplement: pgen.1008913.s003.pdf [file pgen.1008913.s003.pdf]
