# Supplementary material for: Mms19 promotes spindle microtubule assembly in Drosophila neural stem cells
Source: PubMed Central journal article supplement (PMC7714366; doi:10.1371/journal.pgen.1008913), 2020-11-19

# S4 Fig: *Mms19* is necessary for centrosomal localization of Msp<sub>s</sub> in NBs

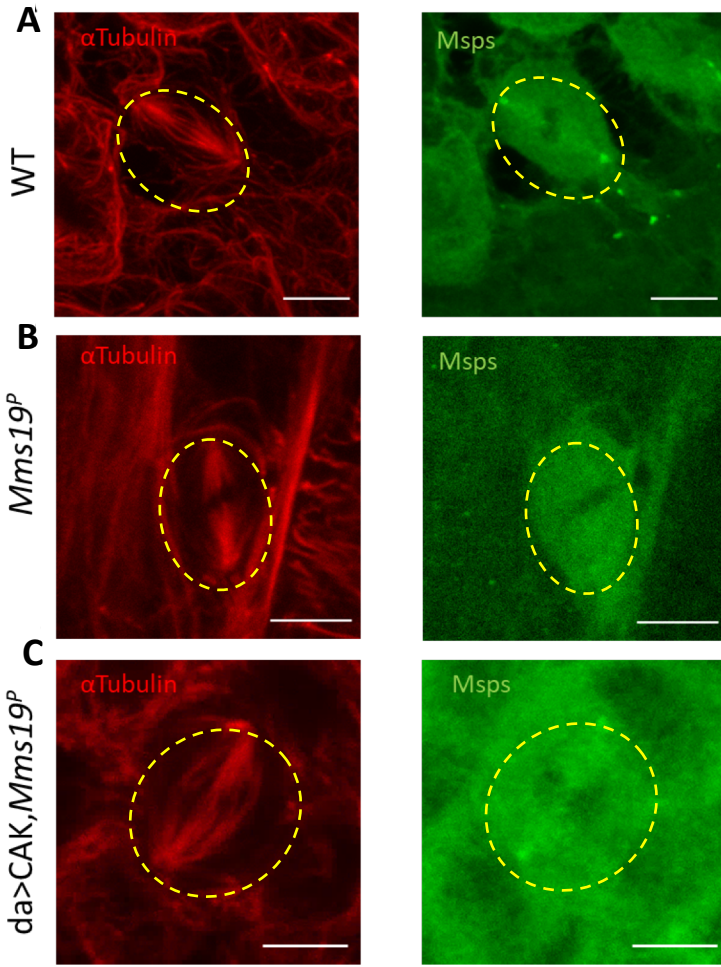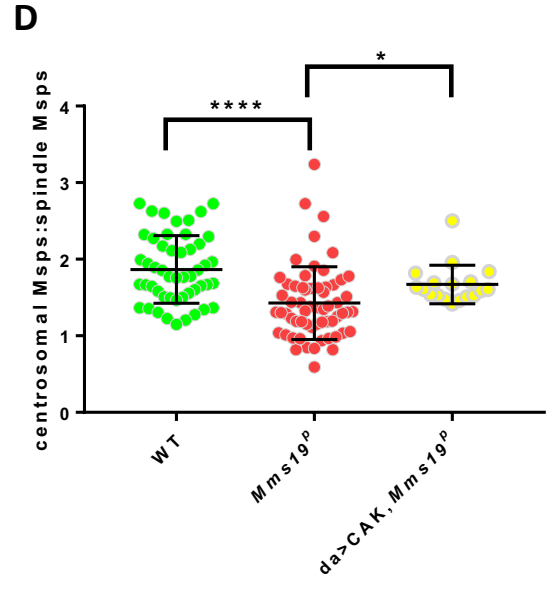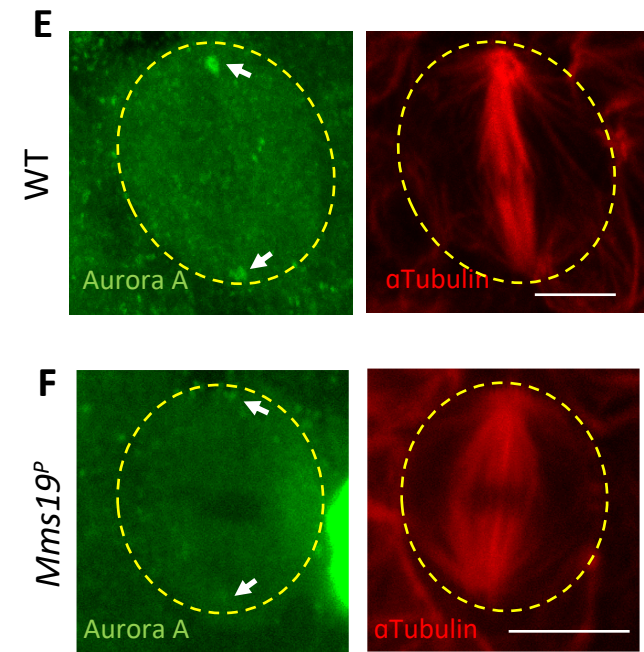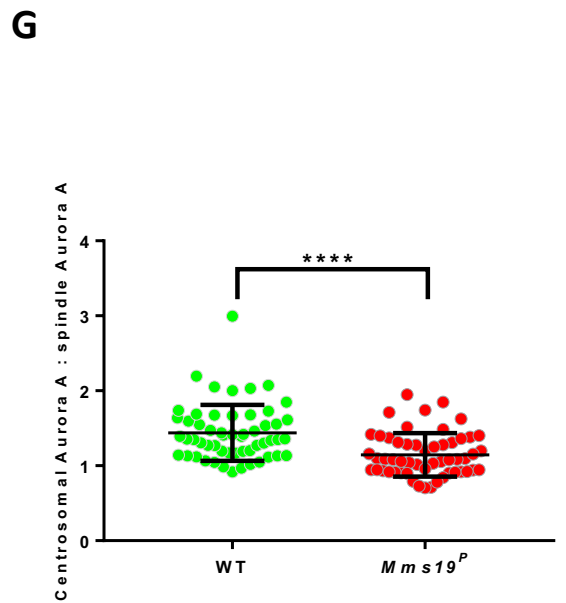

Supplement: pgen.1008913.s004.pdf [file pgen.1008913.s004.pdf]
