# Supplementary material for: Mms19 promotes spindle microtubule assembly in Drosophila neural stem cells
Source: PubMed Central journal article supplement (PMC7714366; doi:10.1371/journal.pgen.1008913), 2020-11-19
Supplement: pgen.1008913.s007.pdf [file pgen.1008913.s007.pdf]

## S1 Table

In order to find novel Mms19-interacting proteins, we prepared protein extracts from adult flies expressing Mms19::eGFP and performed co-IP with anti-GFP antibody-coated beads. Protein complexes bound to the beads were then analyzed by Mass spectrometry. Simultaneously, we also performed co-IP and Mass spectrometry analysis for protein extracts prepared from wild type and Imp::GFP expressing flies to determine any non-specific binding to the antibody, beads or GFP. Amongst other interesting candidates, we found the Cytoplasmic Iron sulfur Assembly (CIA) proteins and some Microtubule associated proteins exclusively co-purifying with Mms19::eGFP. Tubulin on the other hand is quite abundant and was hence found in co-IPs of all extracts, although it was clearly enriched in the Mms19::eGFP extract compared to the wild type.

### Abbreviations used:

**PSM:** Peptide Spectral Match, defines a potentially correct interpretation of a single fragment spectrum.

**SpS:** Spectrum Summation, counting of how many times one particular protein was identified by peptide spectral matches. Also referred to as spectrum counting.

**PMSS:** Protein Match Score Summation, all scores from peptide spectral matches to one particular protein are added up irrespective of whether a peptide was identified several times, with or without modifications. PMSS is sort of an extension of SpS, adding a spectral quality factor. The idea is that fragment spectra of peptides coming from high abundant proteins in the sample will result more often in good quality spectra than peptides from low abundant proteins. In the latter case there are less parent ions available for fragmentation which results in decreased fragment ion intensities or noisy spectra which will receive decreased scores.

The table lists proteins found to exclusively co-purify with Mms19::eGFP. CIA proteins, which are already known to form a complex with Mms19, are highlighted in **Red**. Microtubule associated proteins are highlighted in **Green**.

| Protein                                                       | Accession no.    | PMSS       | Total coverage (%) | Total PSMs | Total Peptides |
|---------------------------------------------------------------|------------------|------------|--------------------|------------|----------------|
| Putative elongator complex protein 1 (ELP1)                   | Q9VGK7           | 1078.27928 | 30.75              | 100        | 35             |
| Probable cytosolic iron-sulfur protein assembly protein Ciao1 | Q7K1Y4           | 795.474183 | 38.21              | 76         | 14             |
| Probable cytosolic Fe-S cluster assembly factor CG17683       | Q8SYS7           | 765.08696  | 46.54              | 77         | 20             |
| Probable elongator complex protein 3                          | Q9VQZ6           | 637.901947 | 44.93              | 61         | 21             |
| Cytoplasmic tRNA 2-thiolation protein 2                       | Q9VIV3           | 574.234751 | 51.36              | 52         | 17             |
| CG6907, isoform B;                                            | X2J4N6           | 554.880346 | 40.27              | 51         | 15             |
| Importin subunit alpha                                        | P52295           | 362.428368 | 34.1               | 34         | 12             |
| Probable elongator complex protein 2 (ELP2)                   | Q7K4B3           | 359.419502 | 25.69              | 36         | 17             |
| Cytoplasmic tRNA 2-thiolation protein 1                       | Q7JWW5           | 342.765471 | 36.44              | 33         | 10             |
| Ribonucleoside-diphosphate reductase large subunit            | P48591           | 342.380554 | 20.69              | 33         | 14             |
| LD47396p;                                                     | Q9VHL2           | 329.163679 | 33.09              | 39         | 15             |
| CG17374;                                                      | Q7PLB8           | 309.738944 | 8.06               | 38         | 18             |
| MIP18 family protein CG7949                                   | Q9VTC4           | 309.256955 | 64.1               | 28         | 7              |
| CG6523-PA;                                                    | Q9VJZ6           | 302.20667  | 60.65              | 28         | 9              |
| Anon-i1 protein;                                              | Q24050           | 295.765288 | 48.47              | 28         | 11             |
| DID;                                                          | Q9NH01           | 294.77212  | 34.66              | 24         | 8              |
| Dynamamin related protein 1, isoform A;                       | Q9VQE0           | 286.587794 | 17.14              | 28         | 11             |
| Importin subunit beta                                         | O18388           | 257.005417 | 15.27              | 25         | 10             |
| T-complex protein 1 subunit delta                             | Q9VK69           | 252.435812 | 30.96              | 30         | 13             |
| Cullin-associated NEDD8-dissociated protein 1                 | Q9VKY2           | 235.573965 | 11.38              | 26         | 13             |
| D-Importin 7/RanBP7;                                          | Q9VSD6           | 234.518326 | 9.34               | 26         | 8              |
| 26S proteasome non-ATPase regulatory subunit 11               | Q7KLV9           | 231.276633 | 19.19              | 24         | 9              |
| RuvB-like helicase 1 (Dpon)                                   | Q9VH07           | 177.620244 | 26.1               | 17         | 8              |
| FI07923p;                                                     | Q9VN44           | 170.520532 | 12.49              | 20         | 10             |
| Ef1alpha-like factor, isoform A;                              | Q9VK85           | 164.386313 | 15.02              | 18         | 8              |
| Proteasome subunit beta type-3                                | Q9XYN7           | 161.38841  | 28.78              | 14         | 5              |
| Asparaginyl-tRNA synthetase, isoform A;                       | Q9V434           | 160.477915 | 13.62              | 16         | 7              |
| Regulatory particle triple-A ATPase 4;                        | Q9W414           | 152.897841 | 27.96              | 16         | 10             |
| Proteasome subunit alpha type-5                               | Q95083           | 151.799911 | 30.74              | 17         | 7              |
| Coatomer subunit gamma (Gamma-COP) [ISOFORM C]                | Q8I0G5_ISOFORM_C | 150.822963 | 7.4                | 13         | 5              |
| Proteasomal ubiquitin receptor ADRM1 homolog                  | Q7K2G1           | 149.996583 | 23.65              | 16         | 6              |
| Exportin-2 (Exp2)                                             | Q9XZU1           | 149.570563 | 9.44               | 15         | 7              |
| V-type proton ATPase subunit H (V-ATPase subunit H)           | Q9V3J1           | 140.253873 | 17.95              | 15         | 7              |

|                                                                                              |                  |            |       |    |   |
|----------------------------------------------------------------------------------------------|------------------|------------|-------|----|---|
| Chromatin assembly factor 1 subunit, isoform B;                                              | E1JIL4           | 138.902673 | 9.56  | 13 | 4 |
| Transport and golgi organization 7, isoform B;                                               | A0A0B4LFB3       | 135.903285 | 18.09 | 18 | 7 |
| Eukaryotic translation initiation factor 3 subunit C (eIF3c)                                 | A1ZAX1           | 134.87918  | 9.12  | 17 | 8 |
| Eukaryotic translation initiation factor 3 subunit F-1 (eIF3f-1)                             | Q9VN50           | 134.585454 | 17.14 | 14 | 4 |
| Alpha-mannosidase                                                                            | Q8IPB7           | 134.192405 | 7.13  | 14 | 5 |
| Proteasome subunit beta type-1 [CHAIN 0]                                                     | P40304_CHAIN_0   | 133.196417 | 40.47 | 19 | 6 |
| Uncharacterized protein CG16817                                                              | Q9VH95           | 129.659679 | 31.52 | 10 | 4 |
| GH27579p;                                                                                    | Q9V3D8           | 128.576844 | 13.98 | 16 | 6 |
| Probable glutamine--tRNA ligase (GlnRS)                                                      | Q9Y105           | 127.130684 | 7.58  | 12 | 5 |
| Proteasome subunit alpha type-1                                                              | P12881           | 124.839184 | 30.82 | 15 | 7 |
| Ubiquitin carboxyl-terminal hydrolase                                                        | Q9XZ61           | 123.734264 | 18.83 | 16 | 6 |
| Eip55E, isoform A;                                                                           | Q7JXZ2           | 120.938782 | 18.83 | 15 | 6 |
| Dynein heavy chain, cytoplasmic (DYHC) [ISOFORM C]                                           | P37276_ISOFORM_C | 120.90723  | 1.96  | 13 | 8 |
| Leukotriene A(4) hydrolase (LTA-4 hydrolase)                                                 | Q9VJ39           | 120.257714 | 17.62 | 13 | 8 |
| CG4847, isoform A;                                                                           | Q7K5N8           | 117.236533 | 21.79 | 16 | 5 |
| Probable 3-hydroxyisobutyrate dehydrogenase, mitochondrial (HIBADH) [CHAIN 0]                | Q9V8M5_CHAIN_0   | 116.729559 | 17.73 | 12 | 4 |
| GH11341p;                                                                                    | Q9V3Z4           | 115.20378  | 5.78  | 15 | 3 |
| DNA polymerase                                                                               | Q9VCN1           | 113.17361  | 3.62  | 12 | 7 |
| LD24721p;                                                                                    | Q9VJD4           | 111.577302 | 12.08 | 14 | 3 |
| FI22042p1;                                                                                   | T2GF16           | 110.823946 | 5.34  | 13 | 5 |
| BcDNA.GH02678;                                                                               | Q9Y162           | 110.087038 | 11.31 | 11 | 5 |
| Protein krasavietz (Decp) (eIF5C domain-containing protein)                                  | Q9VNE2           | 109.953585 | 8.77  | 15 | 4 |
| Eukaryotic translation initiation factor 3 subunit E (eIF3e)                                 | O77410           | 109.575072 | 14.02 | 11 | 6 |
| Protein purity of essence                                                                    | Q9VLT5           | 108.664591 | 2.03  | 12 | 9 |
| CG6453, isoform A;                                                                           | Q9VJD1           | 108.035339 | 6.75  | 15 | 4 |
| 26S proteasome non-ATPase regulatory subunit 14                                              | Q9V3H2           | 107.405637 | 25.32 | 14 | 6 |
| Coatomer subunit beta (Beta-COP)                                                             | P45437           | 104.684205 | 5.29  | 11 | 4 |
| Stathmin-1;                                                                                  | Q9GQR6           | 104.133146 | 14.53 | 9  | 3 |
| CG12244-PA;                                                                                  | O62602           | 103.392352 | 12.87 | 11 | 4 |
| Calcium-binding protein 1, isoform A;                                                        | Q9V438           | 103.241084 | 13.63 | 13 | 5 |
| CG2918, isoform B;                                                                           | O46067           | 102.824666 | 6.93  | 11 | 5 |
| Ubiquitin carboxyl-terminal hydrolase                                                        | Q9VKZ8           | 102.635563 | 8     | 9  | 3 |
| Probable 26S proteasome non-ATPase regulatory subunit 3 (26S proteasome subunit S3) (DOX-A2) | P25161           | 102.195153 | 8.1   | 15 | 4 |
| SD25413p;                                                                                    | Q86NM8           | 100.882168 | 9     | 11 | 3 |

|                                                                     |                  |            |       |    |   |
|---------------------------------------------------------------------|------------------|------------|-------|----|---|
| Amidophosphoribosyltransferase (ATase)                              | Q9VRZ1           | 100.861053 | 13.62 | 14 | 6 |
| Serine/threonine-protein phosphatase PP2A                           | P23696           | 99.301938  | 19.74 | 11 | 5 |
| Proteasome subunit beta type-4                                      | Q9VNA5           | 97.072653  | 11.94 | 13 | 3 |
| Serine/threonine-protein phosphatase 2A 55 kDa regulatory subunit B | C8VV30           | 93.750053  | 12.19 | 11 | 4 |
| Peptidoglycan-recognition protein SB1 [CHAIN 0]                     | Q70PY2_CHAIN_0   | 92.932968  | 22.29 | 9  | 4 |
| Ribosomal protein S29, isoform B;                                   | A0A0C4DHE8       | 92.31717   | 50    | 15 | 3 |
| AT11715p;                                                           | Q8MR83           | 91.962815  | 7.62  | 9  | 5 |
| CG8778;                                                             | A1Z934           | 90.897119  | 11.71 | 11 | 3 |
| CG1707;                                                             | A1Z6X6           | 90.626258  | 21.59 | 14 | 3 |
| Ubiquitin carboxyl-terminal hydrolase                               | Q9VZU7           | 90.607458  | 9.43  | 12 | 7 |
| LD20211p;                                                           | Q9W0S7           | 88.912386  | 6.26  | 11 | 5 |
| <b>Kinesin heavy chain</b>                                          | P17210           | 88.485361  | 6.15  | 11 | 5 |
| CG2767;                                                             | Q9VHX4           | 86.79088   | 12.77 | 10 | 4 |
| CG10652-PA, isoform A;                                              | Q9VJ19           | 85.436545  | 27.03 | 11 | 3 |
| AT25839p;                                                           | Q5U0U9           | 83.524201  | 2.82  | 8  | 3 |
| RH58777p;                                                           | Q8SXW1           | 82.654699  | 21.43 | 14 | 2 |
| CG7911, isoform A;                                                  | Q9VAC4           | 82.138146  | 27.56 | 8  | 3 |
| CG12171;                                                            | Q9VNF3           | 82.129288  | 14.4  | 8  | 3 |
| Serine/threonine-protein phosphatase alpha-3 isoform                | Q05547           | 80.845538  | 9.6   | 10 | 3 |
| CG3226-PA;                                                          | Q9W3Y3           | 79.976904  | 16.09 | 8  | 3 |
| Tyrosine--tRNA ligase                                               | Q9VV60           | 78.389427  | 10.67 | 8  | 5 |
| CG9436;                                                             | Q7JVH6           | 77.762115  | 17.04 | 10 | 5 |
| Eukaryotic translation initiation factor 3 subunit H (eIF3h)        | Q9U9Q4           | 77.167678  | 10.65 | 9  | 3 |
| CG1041, isoform B;                                                  | Q0KIA8           | 76.669146  | 7.46  | 11 | 4 |
| Regulatory particle non-ATPase 10, isoform B;                       | M9PIG8           | 76.52857   | 8.33  | 9  | 3 |
| Odorant-binding protein 56e, isoform B;                             | A0A0B4LFW3       | 74.809926  | 23.66 | 9  | 3 |
| MIP08680p;                                                          | Q9VDY8           | 74.174086  | 24.26 | 8  | 4 |
| Dynamin [ISOFORM 2]                                                 | P27619_ISOFORM_2 | 72.157736  | 6.51  | 8  | 4 |
| 26S proteasome regulatory complex subunit p39A;                     | Q7KMP8           | 71.026223  | 12.3  | 9  | 4 |
| Peptidyl-prolyl cis-trans isomerase                                 | Q9VGK3           | 70.85612   | 18.84 | 8  | 2 |
| CG12512;                                                            | Q9VMR6           | 70.80174   | 7.42  | 12 | 4 |
| General odorant-binding protein 99a [CHAIN 0]                       | Q9VAJ4_CHAIN_0   | 70.008403  | 21.43 | 14 | 3 |
| 6-phosphogluconate dehydrogenase, decarboxylating                   | P41572           | 69.066395  | 13.31 | 12 | 5 |
| Eukaryotic initiation factor 4B, isoform E;                         | Q7PLL1           | 68.644589  | 14.65 | 11 | 4 |
| Protein NASP homolog                                                | Q9I7K6           | 66.902889  | 10.37 | 6  | 3 |
| CG2862, isoform B;                                                  | Q86BQ4           | 66.827759  | 28.57 | 8  | 3 |
| Dihydropteridine reductase;                                         | Q9VSU6           | 65.57742   | 11.49 | 5  | 2 |
| CG13072-PA;                                                         | Q9VUZ8           | 64.853286  | 17.29 | 6  | 2 |
| Carboxypeptidase [CHAIN 0]                                          | Q9VDT5_CHAIN_0   | 64.169304  | 5.7   | 7  | 2 |

|                                                                                       |                |           |       |    |   |
|---------------------------------------------------------------------------------------|----------------|-----------|-------|----|---|
| Gag protein;                                                                          | Q9NHF8         | 62.915404 | 6.43  | 10 | 2 |
| CG3663;                                                                               | Q9W127         | 61.90281  | 13.46 | 5  | 2 |
| CG15261-PA;                                                                           | Q9V3W0         | 60.683397 | 30.43 | 8  | 3 |
| MIP16878p;                                                                            | D3PFE0         | 60.21821  | 4.35  | 7  | 4 |
| 40S ribosomal protein S5b                                                             | Q9VFE4         | 59.94444  | 14.35 | 9  | 4 |
| Myosin-2 essential light chain                                                        | P54357         | 59.22928  | 27.21 | 5  | 3 |
| NAT1 ortholog, isoform A;                                                             | Q9VW12         | 58.946433 | 3.03  | 7  | 2 |
| Coproporphyrinogen oxidase, isoform B;                                                | X2J9R2         | 58.26964  | 5.64  | 10 | 2 |
| DNA replication licensing factor Mcm6 (DmMCM6)                                        | Q9V461         | 58.103871 | 4.65  | 6  | 3 |
| Mutant tan;                                                                           | Q9W369         | 57.867012 | 6.72  | 5  | 2 |
| 40S ribosomal protein S27                                                             | Q9VBU9         | 56.930696 | 22.62 | 10 | 2 |
| Dihydropyrimidine dehydrogenase;                                                      | Q9W374         | 56.391749 | 3.3   | 6  | 3 |
| V-type proton ATPase subunit D 1 (V-ATPase subunit D 1)                               | Q9V7D2         | 56.318904 | 9.35  | 10 | 2 |
| SD06613p;                                                                             | Q960D3         | 55.989689 | 8.5   | 8  | 3 |
| COP9 signalosome complex subunit 7 (Dch7) (Signalosome subunit 7)                     | Q9V4S8         | 55.844796 | 13.67 | 6  | 3 |
| CG3603, isoform B;                                                                    | Q9W4U2         | 54.727119 | 10.44 | 5  | 2 |
| Deoxyuridine triphosphatase, isoform B;                                               | Q8IPB1         | 54.204969 | 17.24 | 6  | 3 |
| Ribosomal protein S5a, isoform B;                                                     | X2JKU5         | 54.12625  | 17.98 | 10 | 5 |
| Glutathione synthetase (GSH-S)                                                        | Q8IQZ1         | 54.012329 | 5.91  | 5  | 2 |
| Female-specific independent of transformer;                                           | Q9VD66         | 53.872528 | 19.83 | 5  | 2 |
| Phospholipase A2 activator protein, isoform A;                                        | Q9VPY2         | 53.862268 | 2.92  | 8  | 2 |
| ADP-ribosylation factor 1 [CHAIN 0]                                                   | P61209_CHAIN_0 | 53.852292 | 9.94  | 5  | 3 |
| Gag protein;                                                                          | Q0GA05         | 53.755813 | 3.99  | 6  | 2 |
| CG1943, isoform A;                                                                    | Q9VI56         | 53.322602 | 31.36 | 7  | 2 |
| LD43045p;                                                                             | Q8SWV7         | 52.947145 | 1.56  | 6  | 2 |
| Accessory gland protein Acp62F [CHAIN 0]                                              | O46202_CHAIN_0 | 52.767269 | 31.87 | 8  | 3 |
| CG34215;                                                                              | A8DY49         | 52.642595 | 20.19 | 8  | 2 |
| Cystathionine beta-synthase                                                           | Q9VRD9         | 51.33755  | 4.41  | 5  | 2 |
| CG3835, isoform A;                                                                    | Q7K511         | 51.230366 | 8.07  | 5  | 3 |
| GM13889p;                                                                             | Q8MRJ8         | 51.20354  | 6.81  | 10 | 2 |
| CG6330, isoform B;                                                                    | Q8IMQ8         | 50.807596 | 5.48  | 6  | 2 |
| CG17514, isoform A;                                                                   | Q7PLL6         | 50.662459 | 1.14  | 9  | 3 |
| CG7322, isoform B;                                                                    | Q9VWP2         | 50.173374 | 13.22 | 7  | 3 |
| Burgundy, isoform B;                                                                  | Q9VIE7         | 50.143559 | 2.78  | 7  | 2 |
| Sperm-specific dynein intermediate chain 1, isoform C;                                | M9NE47         | 50.055616 | 7.5   | 7  | 3 |
| Kinesin light chain, isoform B;                                                       | M9PF24         | 49.874176 | 13.19 | 6  | 5 |
| Tim8, isoform B;                                                                      | X2JB87         | 49.338077 | 30.68 | 4  | 2 |
| LD16419p;                                                                             | Q9VW59         | 49.054259 | 11.44 | 11 | 3 |
| CG8209;                                                                               | Q9VSC5         | 48.93248  | 9.67  | 4  | 2 |
| Replication protein A 70 kDa DNA-binding subunit (RP-A p70) (RF-A protein 1) (DmRPA1) | Q24492         | 47.526955 | 3.32  | 4  | 2 |

|                                                                             |                |           |       |   |   |
|-----------------------------------------------------------------------------|----------------|-----------|-------|---|---|
| Serine protease inhibitor (Serpin-5);                                       | Q9U1I4         | 47.265776 | 5.62  | 6 | 2 |
| CG16826, isoform A;                                                         | Q9VK00         | 47.078998 | 12.61 | 5 | 3 |
| CG9273 protein;                                                             | Q9VIH1         | 46.879655 | 12.6  | 5 | 2 |
| LD22082p;                                                                   | Q9VLQ9         | 46.838306 | 6.24  | 5 | 3 |
| DNA replication licensing factor Mcm3 (DmMCM3)                              | Q9XYU1         | 46.585268 | 2.32  | 5 | 2 |
| LP08082p;                                                                   | Q9VGP4         | 46.372649 | 4.13  | 5 | 3 |
| CG10126, isoform A;                                                         | Q9VG23         | 46.363266 | 13.49 | 4 | 2 |
| MIP14975p;                                                                  | D0Z726         | 45.705535 | 24.72 | 5 | 2 |
| Smt3 activating enzyme 2;                                                   | Q9VSD9         | 45.602776 | 4     | 5 | 2 |
| Methionine aminopeptidase 2 (MAP 2) (MetAP 2)                               | Q9VL89         | 45.36067  | 4.46  | 4 | 2 |
| CG1236;                                                                     | Q8I725         | 45.028941 | 6.34  | 5 | 2 |
| CG11878;                                                                    | Q9VBT8         | 44.92775  | 6.19  | 4 | 2 |
| GH08387p;                                                                   | Q9VHA2         | 43.575072 | 18.43 | 6 | 3 |
| Small nuclear ribonucleoprotein-associated protein B (snRNP-B) (Sm-B) (SmB) | Q05856         | 43.555329 | 11.56 | 7 | 2 |
| RE07481p;                                                                   | Q8SXL6         | 43.490619 | 9.54  | 4 | 2 |
| Methylthioadenosine phosphorylase ortholog, isoform C;                      | A0A0B4LFH0     | 43.271402 | 9.69  | 7 | 3 |
| BcDNA.HL02693;                                                              | Q9V3N7         | 43.157532 | 5.6   | 9 | 3 |
| GH14654p;                                                                   | Q7KK90         | 42.940316 | 7.14  | 5 | 2 |
| CG5590;                                                                     | Q9VB10         | 42.718398 | 5.83  | 6 | 2 |
| Probable pseudouridine-5'-phosphatase (5'-PsiMPase)                         | Q94529         | 42.145333 | 11.26 | 6 | 3 |
| CG6767, isoform A;                                                          | Q9VT32         | 41.631079 | 9.43  | 9 | 3 |
| Prefoldin subunit 3                                                         | Q9VGP6         | 40.7714   | 13.92 | 5 | 3 |
| Glucose-6-phosphate 1-dehydrogenase (G6PD)                                  | P12646         | 40.739479 | 4.01  | 9 | 2 |
| Serine/threonine-protein phosphatase                                        | Q8SWU9         | 40.709004 | 6.06  | 4 | 2 |
| Hsp90-related protein TRAP1;                                                | Q7KNF3         | 40.652344 | 6.12  | 5 | 3 |
| Groucho, isoform I;                                                         | A0A0B4KH09     | 40.451027 | 3.15  | 5 | 2 |
| 39 kDa FK506-binding nuclear protein (PPlase)                               | P54397         | 39.425323 | 5.88  | 4 | 2 |
| Alpha-amylase B [CHAIN 0]                                                   | P81641_CHAIN_0 | 39.249233 | 6.3   | 3 | 2 |
| Inositol-3-phosphate synthase (MIP synthase) (IPS) (MI-1-P synthase)        | O97477         | 39.013919 | 9.91  | 4 | 3 |
| RE04051p;                                                                   | Q5BI95         | 38.307076 | 3.68  | 4 | 2 |
| Ubiquitin-like protein activating enzyme N subunit;                         | Q7KJV5         | 38.297655 | 5.93  | 5 | 2 |
| AT05114p;                                                                   | Q8MRS4         | 38.212791 | 1.98  | 4 | 2 |
| Cytochrome b-c1 complex subunit Rieske, mitochondrial                       | Q9VQ29         | 38.120393 | 10.87 | 8 | 2 |
| CG11999;                                                                    | Q9VNA3         | 37.985766 | 14.81 | 5 | 3 |
| CG5012;                                                                     | Q2XYH0         | 37.690651 | 23.67 | 7 | 2 |
| CG2493, isoform A;                                                          | Q9VIM0         | 37.361102 | 5.89  | 5 | 2 |
| ATP-dependent RNA helicase vasa, isoform A                                  | P09052         | 37.137186 | 3.48  | 7 | 2 |
| Nuclear migration protein NudC;                                             | Q9VVA6         | 36.339406 | 5.12  | 5 | 2 |

|                                                                        |                  |           |       |    |   |
|------------------------------------------------------------------------|------------------|-----------|-------|----|---|
| Endonuclease G inhibitor, isoform A;                                   | Q9V3V9           | 35.36594  | 5.85  | 9  | 2 |
| Adenylosuccinate synthetase (AMPSase) (AdSS)                           | F0JAP3           | 35.208644 | 9.23  | 5  | 4 |
| DNA damage-binding protein 1 (D-DDB1)                                  | Q9XYZ5           | 34.877239 | 1.58  | 4  | 2 |
| RE50216p;                                                              | Q8IGP9           | 34.626232 | 13.64 | 6  | 3 |
| CG10672;                                                               | Q9VRJ4           | 34.517959 | 5.68  | 4  | 2 |
| CG1774, isoform A;                                                     | Q9V9W4           | 34.506729 | 6.78  | 5  | 2 |
| IP17959p;                                                              | A4IJ71           | 34.062606 | 7.73  | 4  | 2 |
| Glutathione S transferase E6;                                          | A1ZB71           | 33.548655 | 12.16 | 3  | 2 |
| Protein slender lobes                                                  | Q8INM3           | 33.367991 | 1.55  | 4  | 2 |
| Protein singed                                                         | Q24524           | 33.338293 | 3.91  | 4  | 2 |
| SH3 domain-binding glutamic acid-rich protein homolog (SH3BGR protein) | Q9NFP5           | 33.222539 | 11.39 | 7  | 2 |
| CG10407, isoform A;                                                    | Q9VEZ6           | 33.062111 | 15.83 | 4  | 3 |
| Histone H2A                                                            | Q4AB57           | 32.506428 | 13.71 | 10 | 2 |
| Myosin regulatory light chain sqh (MRLC-C)                             | P40423           | 32.456961 | 21.26 | 5  | 4 |
| CG3714, isoform G;                                                     | M9PC31           | 32.42235  | 5.27  | 7  | 3 |
| CG10964-PA;                                                            | Q9W3H4           | 32.175885 | 8.5   | 6  | 2 |
| Collapsin response mediator protein;                                   | Q8IPQ2           | 32.033792 | 5.05  | 4  | 3 |
| Profilin                                                               | P25843           | 31.648317 | 14.29 | 5  | 2 |
| CG14407;                                                               | Q8SXQ5           | 30.723439 | 16.98 | 7  | 2 |
| Lissencephaly-1, isoform G;                                            | A0A0B4K812       | 30.652584 | 6.57  | 3  | 2 |
| Probable arginine--tRNA ligase, cytoplasmic (ArgRS)                    | Q9VXN4           | 29.109661 | 4.81  | 3  | 3 |
| CG4199, isoform A;                                                     | O77266           | 29.095694 | 3.44  | 3  | 2 |
| Globin;                                                                | Q9U1K3           | 29.091126 | 21.57 | 5  | 3 |
| LD01551p;                                                              | D1Z373           | 28.998582 | 4.79  | 3  | 2 |
| CG9547;                                                                | Q9VMC6           | 28.45929  | 7.88  | 6  | 2 |
| Proteasome subunit beta type                                           | Q9NHX7           | 27.986975 | 8.51  | 3  | 2 |
| Sex-regulated protein janus-A [ISOFORM A]                              | P20348_ISOFORM_A | 27.647884 | 25.21 | 3  | 2 |
| Glycylpeptide N-tetradecanoyltransferase (NMT)                         | O61613           | 27.345608 | 4.66  | 3  | 2 |
| Thiolester containing protein II, isoform E;                           | A0ZWS9           | 27.083716 | 2.93  | 5  | 3 |
| Neural Lazarillo;                                                      | Q9NAZ4           | 26.911862 | 11.61 | 3  | 2 |
| Angiotensin-converting enzyme-related protein [CHAIN 0]                | Q9VLJ6_CHAIN_0   | 26.590681 | 4.28  | 4  | 2 |
| Proteasome subunit alpha type-2                                        | P40301           | 26.174957 | 13.68 | 3  | 2 |
| DNA replication licensing factor Mcm2 (DmMCM2)                         | P49735           | 25.48558  | 2.48  | 3  | 2 |
| Dynein light intermediate chain, isoform A;                            | Q9VZ20           | 24.976181 | 4.67  | 3  | 2 |
| Aldose 1-epimerase                                                     | Q9VRU1           | 24.97472  | 6.04  | 3  | 2 |
| Putative Sec23 protein;                                                | Q9NFN9           | 24.965424 | 4.29  | 3  | 3 |
| CG9360-PA;                                                             | Q9VYU9           | 24.961089 | 7.57  | 6  | 2 |
| cAMP-dependent protein kinase catalytic subunit (PKA C) [CHAIN 0]      | P12370_CHAIN_0   | 24.815355 | 9.94  | 4  | 3 |

|                                                                   |                  |           |       |   |   |
|-------------------------------------------------------------------|------------------|-----------|-------|---|---|
| CG10623 protein;                                                  | Q9VJ31           | 24.674937 | 5.74  | 7 | 2 |
| Nuclear protein localization protein 4 homolog [ISOFORM B]        | Q9VBP9_ISOFORM_B | 24.453279 | 3.37  | 3 | 2 |
| CG13993, isoform B;                                               | Q9VMH8           | 24.317949 | 14.29 | 4 | 2 |
| Methylthioribose-1-phosphate isomerase (M1Pi) (MTR-1-P isomerase) | Q9V9X4           | 23.159481 | 5.77  | 3 | 2 |
| GM14873p;                                                         | Q8T9H2           | 22.649018 | 7.24  | 3 | 2 |
| Glutathione S transferase O3;                                     | Q9VSL2           | 22.393017 | 12.45 | 4 | 3 |
| Proliferating cell nuclear antigen (PCNA)                         | P17917           | 22.331198 | 6.15  | 3 | 2 |
| CG5844;                                                           | Q9VG69           | 22.227807 | 7.41  | 4 | 2 |
| CG9953;                                                           | Q9VS02           | 21.98977  | 8.27  | 5 | 3 |
| GH10029p;                                                         | Q7K571           | 21.58354  | 3.74  | 2 | 2 |
| AT30379p;                                                         | F0JAL1           | 20.185758 | 8.92  | 3 | 2 |
| Probable dynactin subunit 2 (Dynamitin)                           | Q7K2D2           | 19.713939 | 6.58  | 2 | 2 |
| Protein translation factor SUI1 homolog                           | Q9VZS3           | 19.59736  | 17.27 | 3 | 2 |
| RH50948p;                                                         | F0JAK0           | 19.58742  | 10.95 | 2 | 2 |
| Chorion protein S36 [CHAIN 0]                                     | P07182_CHAIN_0   | 19.122952 | 11.74 | 2 | 2 |
| Acidic leucine-rich nuclear phosphoprotein 32 family member A     | Q9V895           | 18.350596 | 12.64 | 3 | 3 |
| CG32473, isoform A;                                               | Q9VFW7           | 18.284285 | 2.87  | 4 | 3 |
| CG31549, isoform A;                                               | Q8SX57           | 18.281097 | 8.56  | 2 | 2 |
| LD37855p;                                                         | Q8T025           | 18.093456 | 8.49  | 2 | 2 |
| Sorting nexin 1, isoform B;                                       | X2J817           | 18.087694 | 5.48  | 2 | 2 |
| Enolase-phosphatase E1                                            | Q9VN95           | 17.962747 | 10.55 | 2 | 2 |
| 26S proteasome regulatory complex subunit p30;                    | Q9V436           | 17.500526 | 12.12 | 2 | 2 |
| Probable protein phosphatase CG10417                              | Q7K4Q5           | 17.202213 | 5.59  | 2 | 2 |
| CG31472, isoform B;                                               | Q7KSW3           | 16.673093 | 8.02  | 2 | 2 |
| Succinyl-CoA:3-ketoacid-coenzyme A transferase                    | M9PGX7           | 16.480237 | 4.67  | 2 | 2 |
| LD45279p;                                                         | Q960M5           | 16.18657  | 6.9   | 2 | 2 |
| CG13175;                                                          | A1Z8U7           | 15.853459 | 20.57 | 2 | 2 |
| ALG-2 interacting protein X;                                      | Q9VB05           | 15.070043 | 1.79  | 2 | 2 |
| Armadillo repeat-containing protein 6 homolog                     | Q7K486           | 14.144357 | 4.09  | 2 | 2 |
